# Supplementary material for: Immune Profile Determines Response to Vaccination against COVID-19 in Kidney Transplant Recipients
Source: MDPI journal article supplement (doi:10.3390/vaccines11101583), 2023-10-11
Supplement: s1 [file s1]

## Supplement Figures

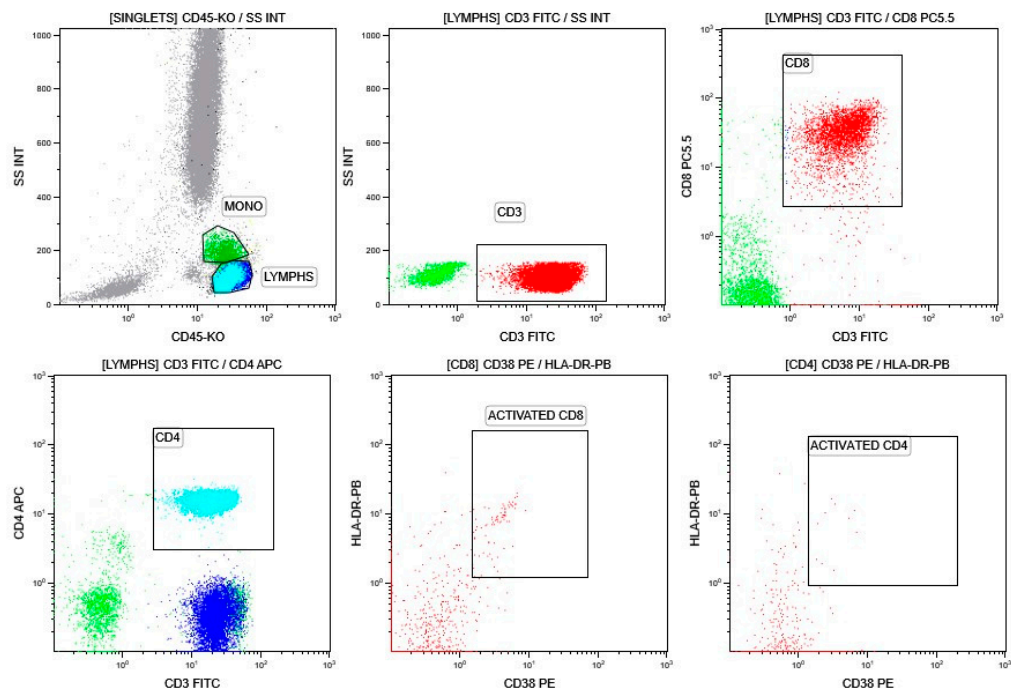

**Supplement Figure S1.** Gating strategy for CD3, CD4, CD8 and Activated CD4, Activated CD8 respectively

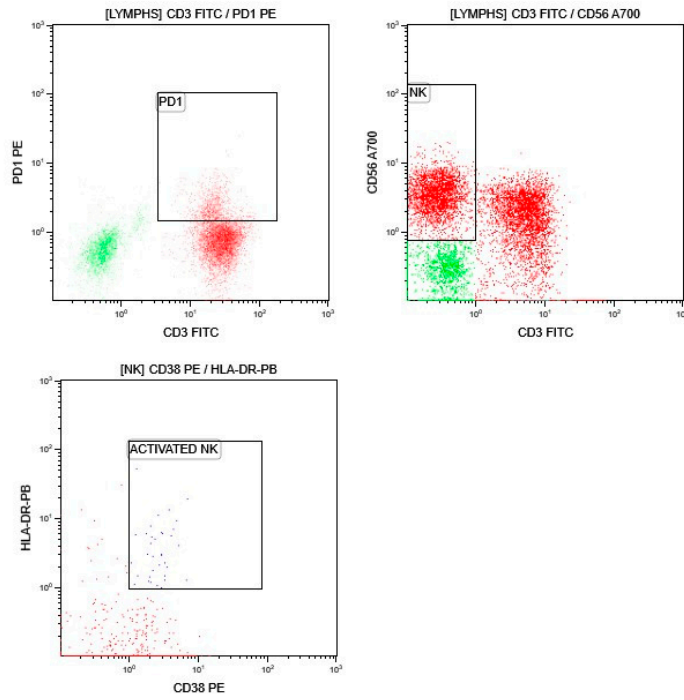

**Supplement Figure S2.** Gating strategy for CD3-CD56+ (Natural Killer - NK) cells and Activated NK cells

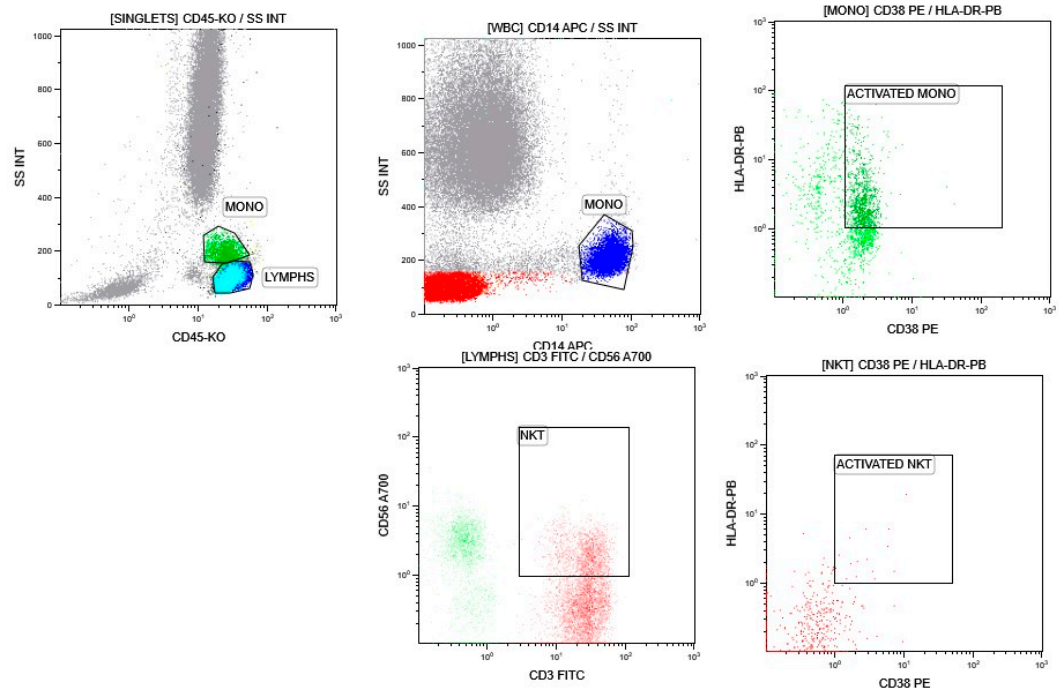

**Supplement Figure S3.** Gating strategy for Monocytes and Activated Monocytes, CD3+CD56+ (NKT cells) and Activated NKT cells

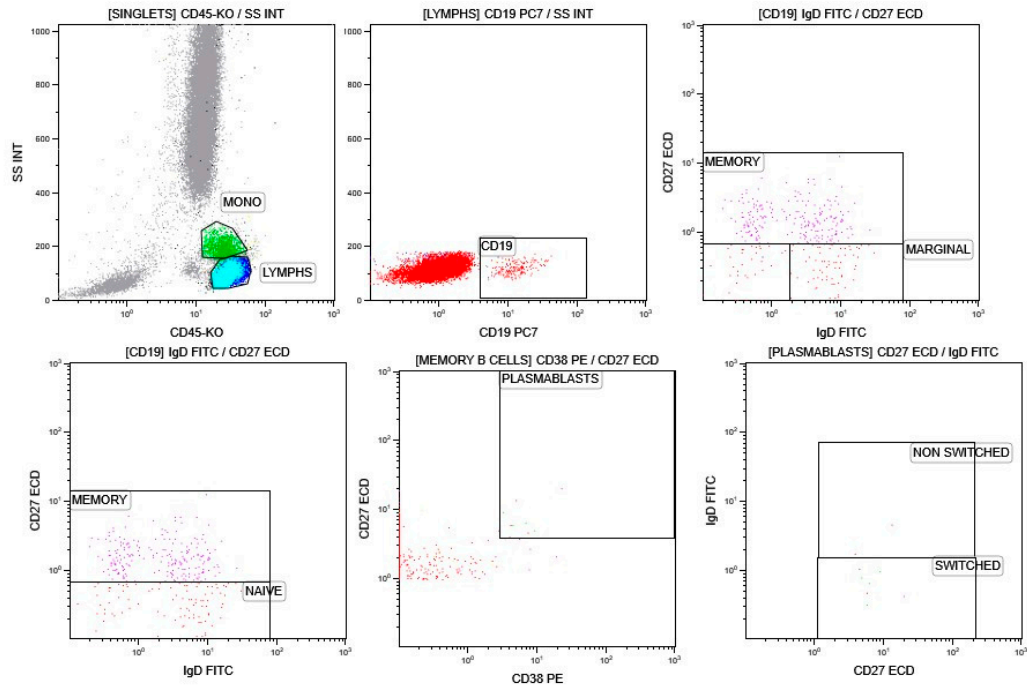

**Supplement Figure S4.** Gating strategy for CD19+ cells, CD19+CD27- (naïve), CD19+CD27+ (memory), CD19+CD27-IgD+ (marginal), CD19+CD27+CD38+ (plasmablasts), CD19+CD27+IgD+ (non switched) and CD19+CD27+IgD- (switched) cells.
